# Supplementary material
Source: PubMed Central journal article supplement (PMC11080958)

**Journal:** Journal of Clinical Virology

**Author name:** Virginie Rougeron

### Declarations

*Journal of Clinical Virology* requires that all authors sign a declaration of conflicting interests. If you have nothing to declare in any of these categories then this should be stated.

#### Conflict of Interest

A conflicting interest exists when professional judgement concerning a primary interest (such as patient's welfare or the validity of research) may be influenced by a secondary interest (such as financial gain or personal rivalry). It may arise for the authors when they have financial interest that may influence their interpretation of their results or those of others. Examples of potential conflicts of interest include employment, consultancies, stock ownership, honoraria, paid expert testimony, patent applications/registrations, and grants or other funding.

**Please note:** All authors should also state in the box below that '**I approved the final manuscript**'. Please note that failure to respond to these questions/statements will mean your submission will be returned to you.

I approved the final manuscript

**Please state any sources of funding for your research**

Gabonese Government and Total Gabon

**Please state whether Ethical Approval was given, by whom and the relevant Judgement's reference number**

**If you are submitting a Randomized Controlled Trial, please state the International Standard Randomised Controlled Trial Number (ISRCTN)**

**Signature** (a scanned signature is acceptable, but each author must sign)

**Print name**

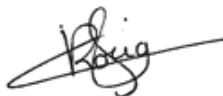

Virginie Rougeron

## Conflicts of Interest Statements

**Journal:** Journal of Clinical Virology

**Author name:** Heinz Feldmann

### Declarations

*Journal of Clinical Virology* requires that all authors sign a declaration of conflicting interests. If you have nothing to declare in any of these categories then this should be stated.

#### Conflict of Interest

A conflicting interest exists when professional judgement concerning a primary interest (such as patient's welfare or the validity of research) may be influenced by a secondary interest (such as financial gain or personal rivalry). It may arise for the authors when they have financial interest that may influence their interpretation of their results or those of others. Examples of potential conflicts of interest include employment, consultancies, stock ownership, honoraria, paid expert testimony, patent applications/registrations, and grants or other funding.

**Please note:** All authors should also state in the box below that **'I approved the final manuscript'**. Please note that failure to respond to these questions/statements will mean your submission will be returned to you.

I approved the final manuscript

**Please state any sources of funding for your research**

Intramural Research Program of the NIAID, NIH

**Please state whether Ethical Approval was given, by whom and the relevant Judgement's reference number**

N/A

**If you are submitting a Randomized Controlled Trial, please state the International Standard Randomised Controlled Trial Number (ISRCTN)**

N/A

  
**Signature** (a scanned signature is acceptable, but each author must sign)

**Print name** (Heinz Feldmann)

3/9/2014

**Journal:** Journal of Clinical Virology

**Author name:** Gilda Grard

### Declarations

*Journal of Clinical Virology* requires that all authors sign a declaration of conflicting interests. If you have nothing to declare in any of these categories then this should be stated.

#### Conflict of Interest

A conflicting interest exists when professional judgement concerning a primary interest (such as patient's welfare or the validity of research) may be influenced by a secondary interest (such as financial gain or personal rivalry). It may arise for the authors when they have financial interest that may influence their interpretation of their results or those of others. Examples of potential conflicts of interest include employment, consultancies, stock ownership, honoraria, paid expert testimony, patent applications/registrations, and grants or other funding.

**Please note:** All authors should also state in the box below that 'I approved the final manuscript'. Please note that failure to respond to these questions/statements will mean your submission will be returned to you.

I approved the final manuscript

Please state any sources of funding for your research

Please state whether Ethical Approval was given, by whom and the relevant Judgement's reference number

If you are submitting a Randomized Controlled Trial, please state the International Standard Randomised Controlled Trial Number (ISRCTN)

Signature (a scanned signature is acceptable, but each author must sign)



Print name

Gilda Grard

**Journal:** Journal of Clinical Virology

**Author name:** Stephan Becker

### Declarations

**Journal of Clinical Virology** requires that all authors sign a declaration of conflicting interests. If you have nothing to declare in any of these categories then this should be stated.

#### Conflict of Interest

A conflicting interest exists when professional judgement concerning a primary interest (such as patient's welfare or the validity of research) may be influenced by a secondary interest (such as financial gain or personal rivalry). It may arise for the authors when they have financial interest that may influence their interpretation of their results or those of others. Examples of potential conflicts of interest include employment, consultancies, stock ownership, honoraria, paid expert testimony, patent applications/registrations, and grants or other funding.

**Please note:** All authors should also state in the box below that '**I approved the final manuscript**'. Please note that failure to respond to these questions/statements will mean your submission will be returned to you.

I approved the final manuscript

#### Please state any sources of funding for your research

Deutsche Forschungsgemeinschaft, Sonderforschungsbereich 593 and 1021

#### Please state whether Ethical Approval was given, by whom and the relevant Judgement's reference number

n/a

#### If you are submitting a Randomized Controlled Trial, please state the International Standard Randomised Controlled Trial Number (ISRCTN)

n/a

**Signature** (a scanned signature is acceptable, but each author must sign)

**Print name** Stephan Becker



**Journal:** Journal of Clinical Virology

**Author name:** LEROY Eric

### Declarations

*Journal of Clinical Virology* requires that all authors sign a declaration of conflicting interests. If you have nothing to declare in any of these categories then this should be stated.

#### Conflict of Interest

A conflicting interest exists when professional judgement concerning a primary interest (such as patient's welfare or the validity of research) may be influenced by a secondary interest (such as financial gain or personal rivalry). It may arise for the authors when they have financial interest that may influence their interpretation of their results or those of others. Examples of potential conflicts of interest include employment, consultancies, stock ownership, honoraria, paid expert testimony, patent applications/registrations, and grants or other funding.

**Please note:** All authors should also state in the box below that '**I approved the final manuscript**'. Please note that failure to respond to these questions/statements will mean your submission will be returned to you.

I approved the final manuscript

**Please state any sources of funding for your research**

Gabonese Government and Total Gabon

**Please state whether Ethical Approval was given, by whom and the relevant Judgement's reference number**

**If you are submitting a Randomized Controlled Trial, please state the International Standard Randomised Controlled Trial Number (ISRCTN)**

**Signature** (a scanned signature is acceptable, but each author must sign)

**Print name**

LEROY Eric



Supplement: NIHMS1985926-supplement-1.pdf [file NIHMS1985926-supplement-1.pdf]
